# Supplementary material for: Measurement of the vertical distributions of atmospheric pollutants using an uncrewed aerial vehicle platform in Xi'an, China
Source: Royal Society of Chemistry journal article supplement (doi:10.1039/d4em00020j), 2024-01-01
Supplement: d4em00020j1.pdf [file d4em00020j1.pdf]

Measurement of the vertical distributions of atmospheric pollutants using an  
uncrewed aerial vehicle platform in Xi'an, China

Dan Liang<sup>a,b,c</sup>, Zhenchuan Niu<sup>a,b,d,\*</sup>, Guowei Wang<sup>b,c,e</sup>, Xue Feng<sup>b,c,f</sup>, Mengni Lyu<sup>b,c</sup>,  
Xiaobing Pang<sup>g</sup>, Ming Li<sup>b</sup>, Huachun Gu<sup>b,c</sup>

<sup>a</sup> *Institute of Global Environmental Change, Xi'an Jiaotong University, Xi'an, 710049  
China*

<sup>b</sup> *State Key Laboratory of Loess and Quaternary Geology, CAS Center for Excellence  
in Quaternary Science and Global Change, Institute of Earth Environment, Chinese  
Academy of Sciences, Xi'an 710061, China*

<sup>c</sup> *Xi'an Institute for Innovative Earth Environment Research, Xi'an, China*

<sup>d</sup> *Open Studio for Oceanic-Continental Climate and Environment Changes, Pilot  
National Laboratory for Marine Science and Technology (Qingdao), Qingdao  
266061, China*

<sup>e</sup> *Shaanxi Provincial Key Laboratory of Accelerator Mass Spectrometry Technology  
and Application, Xi'an AMS Center, Xi'an 710061, China*

<sup>f</sup> *National Observation and Research Station of Regional Ecological Environment  
Change and Comprehensive Management in the Guanzhong Plain, Shaanxi*

<sup>g</sup> *Environment School, Zhejiang University of Technology, Hangzhou, China*

\*Corresponding author. *E-mail addresses:* niuzc@ieecas.cn (Z. Niu)

## Supplementary material

### Tables:

**Table S1**

Summary of uncrewed aerial vehicle (UAV) flights.

| Flight NO. | Date   | Flight time (duration/min) | Flight NO. | Date        | Flight time (duration/min) |
|------------|--------|----------------------------|------------|-------------|----------------------------|
| 1          | July 4 | 15:05-15:13(9)             | 14         | July 7      | 18:07-18:11(5)             |
| 2          | July 4 | 18:27-18:35(9)             | 15         | July 7      | 23:47-23:55(9)             |
| 3          | July 4 | 00:14-00:22(9)             | 16         | November 26 | 07:53-08:01(9)             |
| 4          | July 5 | 08:14-08:22(9)             | 17         | November 26 | 13:38-13:46(9)             |
| 5          | July 5 | 13:15-13:23(9)             | 18         | November 26 | 18:59-19:07(9)             |
| 6          | July 5 | 18:13-18:21(9)             | 19         | November 26 | 22:51-22:59(9)             |
| 7          | July 5 | 23:43-23:51(9)             | 20         | November 27 | 08:44-08:52(9)             |
| 8          | July 6 | 07:14-07:22(9)             | 21         | November 27 | 13:01-13:09(9)             |
| 9          | July 6 | 13:47-13:55(9)             | 22         | November 27 | 18:03-18:11(9)             |
| 10         | July 6 | 18:13-18:21(9)             | 23         | November 27 | 22:56-23:04(9)             |
| 11         | July 6 | 23:13-23:21(9)             | 24         | November 28 | 08:08-08:16(9)             |
| 12         | July 7 | 08:46-08:50(5)             | 25         | November 28 | 23:13-23:21(9)             |
| 13         | July 7 | 13:21-13:29(9)             | 26         | November 30 | 22:52-23:00(9)             |

**Table S2**

Sensor package components and their parameters.

| Item           | Manufacturer   | Dimensions (cm) | Weight (g) | Limit of detection   | Range                    |
|----------------|----------------|-----------------|------------|----------------------|--------------------------|
| O <sub>3</sub> | Alphasense, UK | 2*3.2(H*ID)     | 6          | 1 ppb                | 0–20 ppm                 |
| CO             | Alphasense, UK | 2*3.2(H*ID)     | 12         | 1 ppb                | 0–20 ppm                 |
| PM             | Alphasense, UK | 7.5*6*6(LWH)    | 105        | 10 µg/m <sup>3</sup> | 0–2000 µg/m <sup>3</sup> |

**Table S3**

The pollutant concentrations and wind direction from the nearest ground monitoring station (24.5 km away from the observation site, between observation site and urban area of Xi'an), obtained through the Moji Weather software.

| Date       | Time  | Wind direction | AQI | PM <sub>2.5</sub><br>( $\mu\text{g}/\text{m}^3$ ) | PM <sub>10</sub><br>( $\mu\text{g}/\text{m}^3$ ) | O <sub>3</sub><br>( $\mu\text{g}/\text{m}^3$ ) | CO<br>( $\text{mg}/\text{m}^3$ ) |
|------------|-------|----------------|-----|---------------------------------------------------|--------------------------------------------------|------------------------------------------------|----------------------------------|
| 2021/7/4   | 13:00 | northwest      | 128 | 62                                                | 80                                               | 256                                            | 0.7                              |
|            | 18:00 | southeast      | 65  | 25                                                | 75                                               | 172                                            | 0.6                              |
|            | 23:30 | northwest      | 24  | 13                                                | 24                                               | 48                                             | 0.4                              |
| 2021/7/5   | 08:00 | north          | 63  | 28                                                | 75                                               | 30                                             | 0.6                              |
|            | 13:00 | northeast      | 73  | 31                                                | 96                                               | 78                                             | 0.8                              |
|            | 18:00 | southeast      | 61  | 18                                                | 72                                               | 166                                            | 0.6                              |
|            | 23:30 | west           | 24  | 14                                                | 24                                               | 49                                             | 0.6                              |
| 2021/7/6   | 08:00 | southeast      | 53  | 17                                                | 56                                               | 7                                              | 0.7                              |
|            | 13:00 | southwest      | 53  | 23                                                | 56                                               | 145                                            | 0.7                              |
|            | 18:00 | southeast      | 47  | 16                                                | 24                                               | 149                                            | 0.7                              |
|            | 23:30 | east           | 61  | 15                                                | 71                                               | 90                                             | 0.7                              |
| 2021/7/7   | 08:00 | breeze         | 29  | 13                                                | 29                                               | 32                                             | 0.7                              |
|            | 13:00 | east           | 46  | 15                                                | 39                                               | 147                                            | 0.3                              |
|            | 18:00 | northeast      | 132 | 24                                                | 53                                               | 264                                            | 0.4                              |
|            | 23:30 | southeast      | 54  | 27                                                | 57                                               | 99                                             | 0.5                              |
| 2021/11/26 | 08:00 | southwest      | 73  | 38                                                | 95                                               | 4                                              | 0.6                              |
|            | 13:00 | southwest      | 137 | 104                                               | 153                                              | 18                                             | 1                                |
|            | 18:00 | southwest      | 132 | 100                                               | 178                                              | 35                                             | 1.1                              |
|            | 23:30 | northwest      | 185 | 139                                               | 227                                              | 5                                              | 1.6                              |
| 2021/11/27 | 08:00 | west           | 156 | 119                                               | 186                                              | 5                                              | 1.1                              |
|            | 13:00 | northwest      | 223 | 173                                               | 283                                              | 8                                              | 1.7                              |
|            | 18:00 | southeast      | 247 | 197                                               | 288                                              | 5                                              | 1.7                              |
| 2021/11/28 | 23:30 | southwest      | 264 | 214                                               | 300                                              | 5                                              | 1.8                              |
|            | 08:00 | southwest      | 216 | 166                                               | 224                                              | 5                                              | 1.5                              |
|            | 23:30 | southwest      | 240 | 190                                               | 283                                              | 17                                             | 1.3                              |
| 2021/11/30 | 23:30 | southeast      | 57  | 34                                                | 64                                               | 5                                              | 0.7                              |

**Figs:**

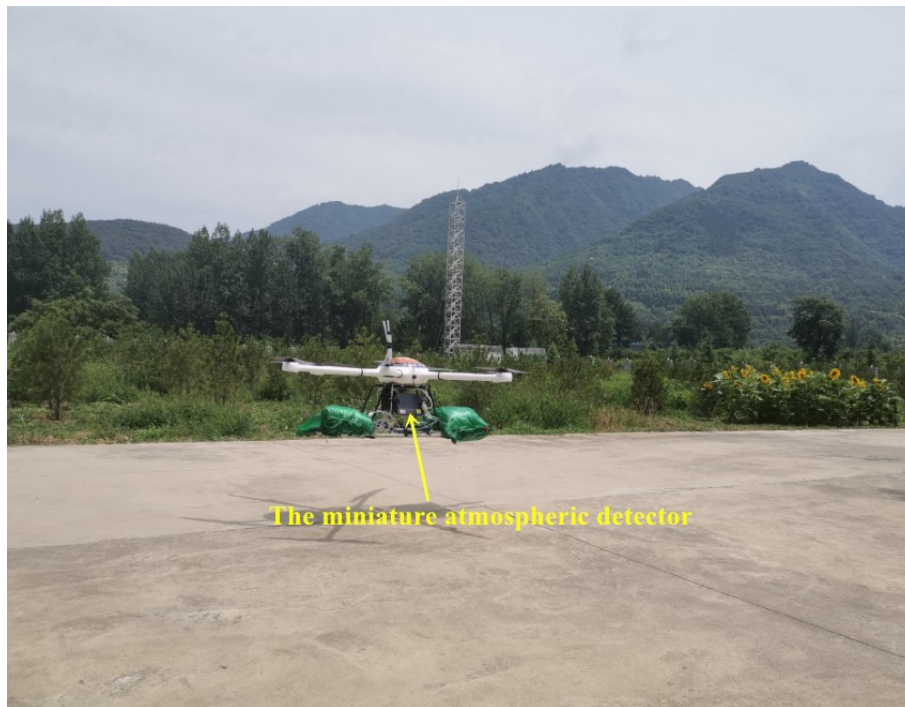

**Fig. S1** A hexacopter uncrewed aerial vehicle carrying the miniature atmospheric detector.

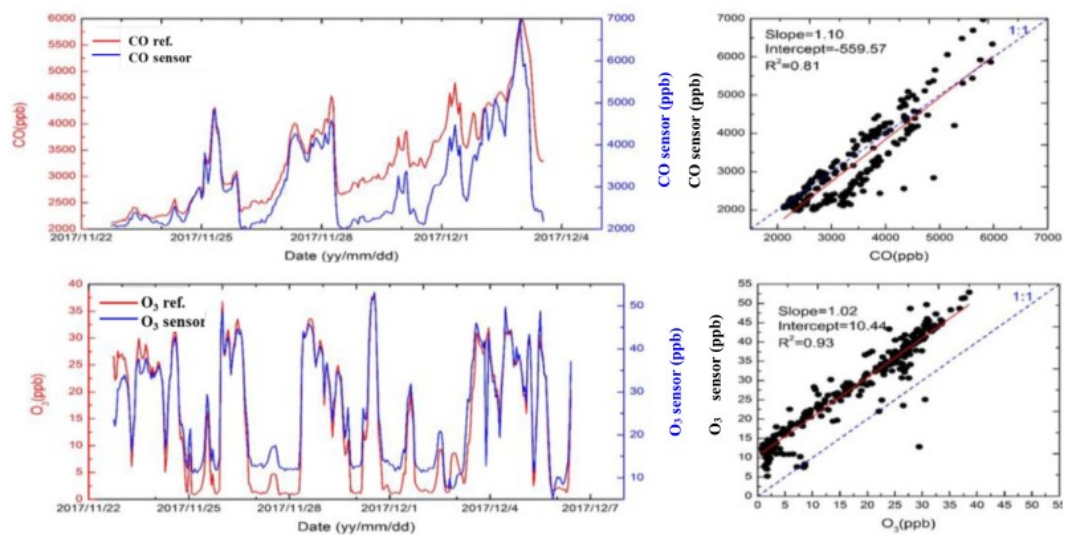

**Fig. S2** Comparison between air pollutant sensors (CO and O<sub>3</sub>) (Alphasense B Series) and reference apparatus (Thermo Fisher, USA) (Pang et al., 2021).

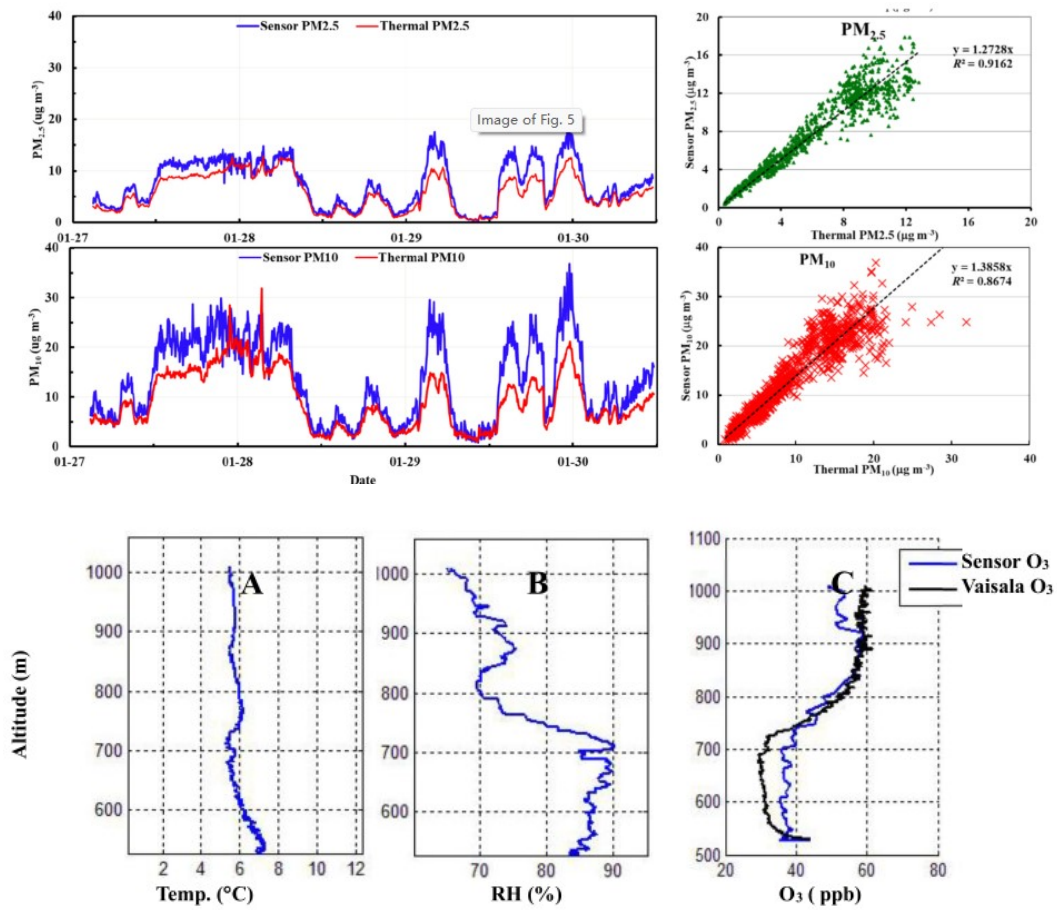

**Fig. S3** Comparison between PM sensor (Alphasense OPC-N2), O<sub>3</sub> sensor (Alphasense) and reference PM apparatus (Thermo Fisher, 5030i PM SHARP Monitor), reference O<sub>3</sub> apparatus (Vaisala, O<sub>3</sub> Sounding Monitor) (Pang et al., 2021).

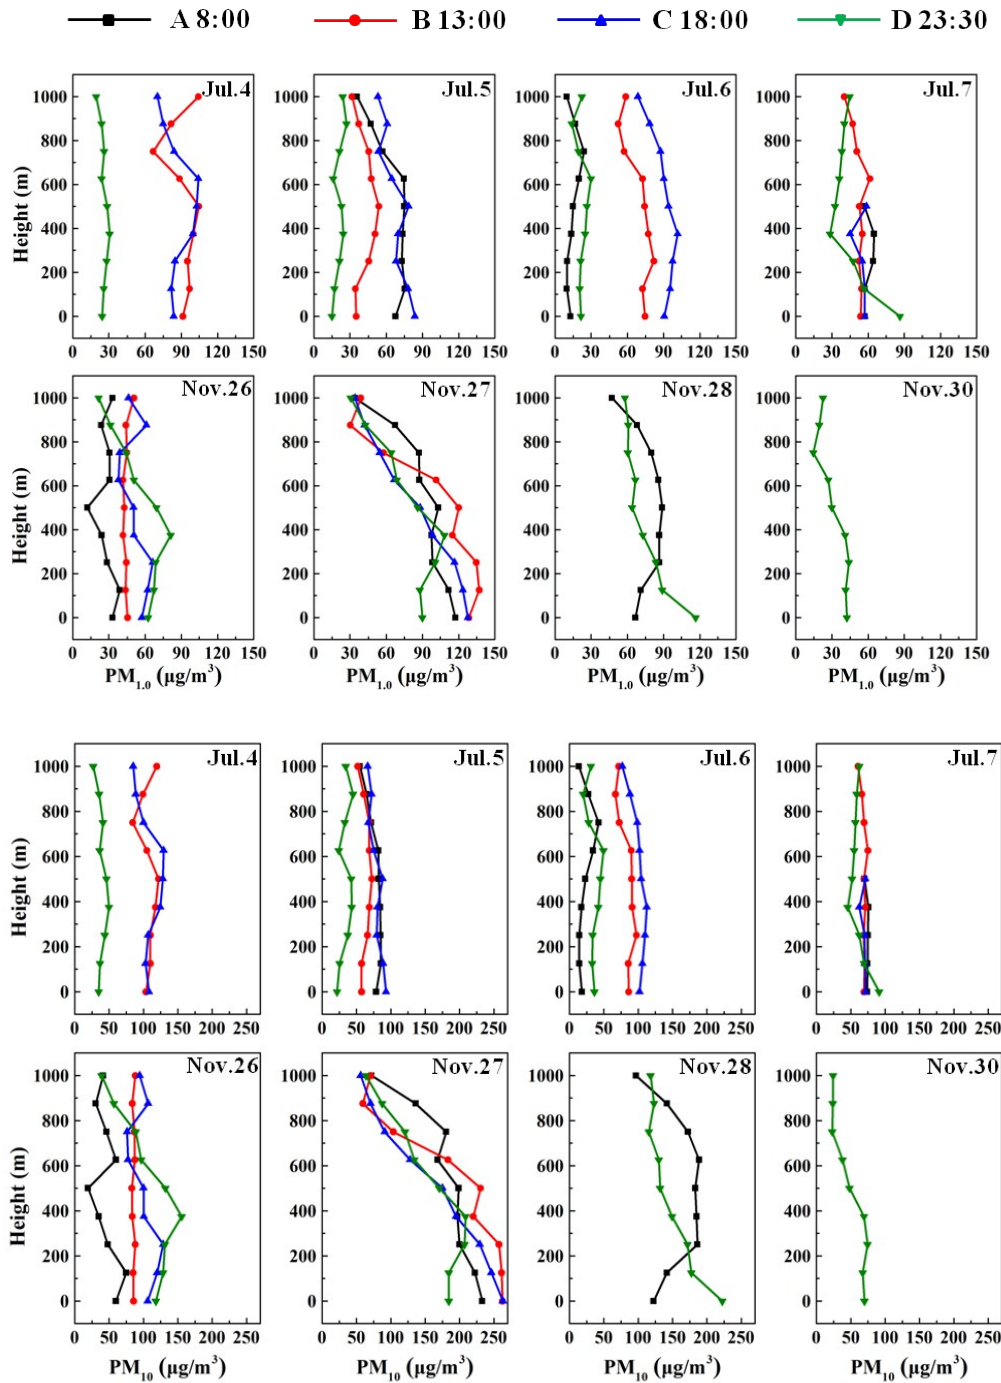

**Fig. S4** Vertical variations of  $PM_{1.0}$  and  $PM_{10}$  concentrations during July (4, 5, 6 and 7) and November (26, 27, 28 and 30), 2021.

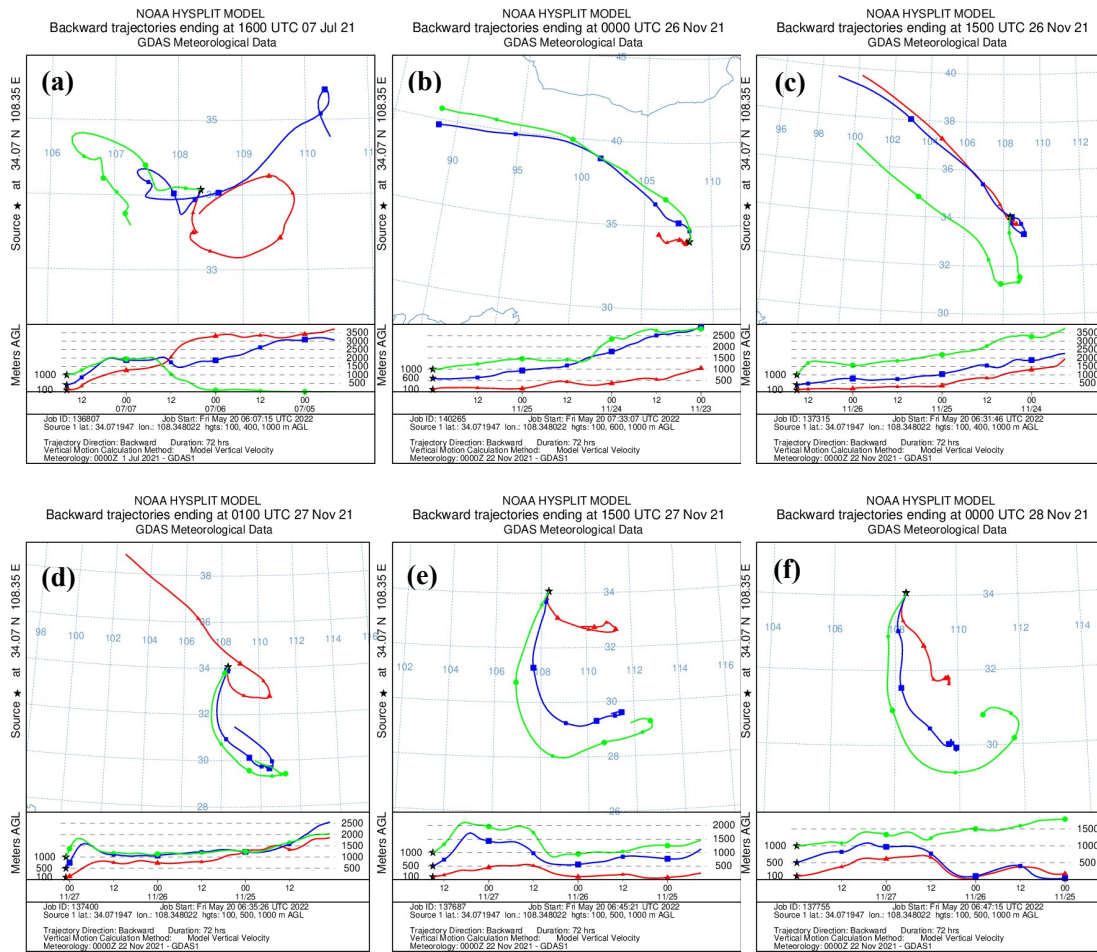

**Fig. S5** The 72-h backward trajectories arriving at the observational site on July 7 and November (26, 27, and 28) at an arrival time (Beijing time) of (a) 23:30 on July 7, (b) 08:00 on November 26, (c) 23:00 on November 26, (d) 9:00 on November 27, (e) 23:00 on November 27, and (f) 08:00 on November 28. The time in the figure is given in UTC, which is 8 hours later than Beijing time.
